# Supplementary material for: Pyrosequencing-based barcodes for a dye-free multiplex bioassay
Source: Royal Society of Chemistry journal article supplement (doi:10.1039/c2cc17618a), 2012-01-01
Supplement: c2cc17618a.pdf [file c2cc17618a.pdf]

## Electronic Supplementary Information (ESI)

### Pyrosequencing-based barcodes for dye-free multiplex bioassay†

Zhiyao Chen,<sup>a</sup> Xiaoying Fu,<sup>b</sup> Xiaodan Zhang,<sup>b</sup> Xiqun Liu,<sup>b</sup> Bingjie Zou,<sup>b</sup> Haiping Wu,<sup>b</sup>  
Qinxin Song,<sup>a</sup> Jinheng Li,<sup>a</sup> Tomoharu Kajiyama,<sup>c</sup> Hideki Kambara<sup>c</sup> and Guohua Zhou<sup>\*a,b</sup>

#### Table of contents

| Supporting methods | Supporting Materials and Methods of BAMGA.                                                                                                                                                   |
|--------------------|----------------------------------------------------------------------------------------------------------------------------------------------------------------------------------------------|
| Fig. S1†           | Flowchart using BAMGA to analyze relative expression levels of a given gene between two different sources (A) and the typical structure of “Y”-shaped source-specific-barcode adapter (B).   |
| Fig. S2†           | Effect of coexisting DNA fragments on the accuracy of BAMGA.                                                                                                                                 |
| Fig. S3†           | Quantitative evaluation of the multiplex bioassay based on BAMGA.                                                                                                                            |
| Fig. S4†           | Pyrograms for decoding barcodes by using dNTPs and ddNTPs in pyrosequencing reaction.                                                                                                        |
| Fig. S5†           | Results of relative gene expression levels of the <i>JUN</i> gene, the <i>RPL19</i> gene, and the <i>FAS</i> gene among 12 different organs of a mouse by multiplex bioassay based on BAMGA. |
| Table S1†          | Results of gene expression levels of the $\beta$ - <i>ACTIN</i> gene among 12 different organs of a mouse by real-time PCR.                                                                  |
| Table S2†          | Comparison of the relative expression levels of the $\beta$ - <i>ACTIN</i> gene among 12 organ tissues of a mouse between BAMGA and real-time PCR.                                           |
| Table S3†          | Results of relative expression levels of the $\beta$ - <i>ACTIN</i> , <i>JUN</i> , <i>RPL19</i> , and <i>FAS</i> gene among 12 organ tissues of a mouse by BAMGA.                            |
| Table S4†          | Primers for relative gene expression analysis by multiplex bioassay based on BAMGA.                                                                                                          |

## Supporting Materials and Methods of BAMGA

### Reagents and chemicals

TaKaRa M-MLV RTase cDNA synthesis kit, *Mbo* I endonuclease, T4 DNA ligase, SYBR *Premix Ex Taq*<sup>TM</sup>, TaKaRa M-MLV RTase cDNA Synthesis Kit and *rTaq* DNA polymerase were purchased from TaKaRa (Dalian, China). Exo<sup>-</sup> Klenow Fragment and QuantiLum recombinant luciferase were purchased from Promega (Madison, WI). TRIzol reagent, Superscript II RNase H<sup>-</sup> Reverse Transcriptase were from Invitrogen (Inc. Faraday Avenue, Carlsbad, CA), and Dynabeads M-280 Streptavidin (2.8 μm) was from DYNAL Biotech ASA (Oslo, Norway). ATP sulfurylase, D-luciferin, bovine serum albumin (BSA), polyvinylpyrrolidone (PVP), adenosine 5'-phosphosulfate (APS), and apyrase were obtained from Sigma (St. Louis, MO). 2'-deoxyguanosine-5'-triphosphate (dGTP), 2'-deoxythymidine-5'-triphosphate (dTTP), 2'-deoxycytidine-5'-triphosphate (dCTP), 2', 3'-dideoxycytidine-5'-triphosphate (ddCTP), 2', 3'-dideoxyguanosine-5'-triphosphate (ddGTP), Sodium 2'-deoxyadenosine-5'-O-(1-triphosphate) (dATPαS), and Sequenase 2.0 were purchased from Amersham Pharmacia Biotech (Amersham, U.K.). BioSpin PCR purification kit was purchased from Bio Flux Corporation (Hangzhou, China). Other chemicals were of a commercially extra-pure grade. All solutions were prepared with deionized and sterilized water.

### RNA extraction and ds-cDNA synthesis

Total RNAs from small intestines, right brain, large intestine, cerebellum, spleen, lung, left brain, bladder, heart, stomach, ear, and kidney tissues of a mouse were extracted using TRIzol reagent according to the manufacturer's instructions. The purity and concentration of the extracted RNA were determined by a UV-Vis spectrophotometer (NaKa Instrument Co., Ltd, Japan). Then 1.5 μg of each total RNAs from different tissues was used for first-strand cDNA synthesis by Superscript II RNase H<sup>-</sup> Reverse Transcriptase, respectively. First, total RNA in RNase-free water was heated to 65 °C for 5 min and cooled on ice for at least 1 min. Then a 10 μl of reaction mixture containing 0.5 mM of each dNTP, 1×RT buffer, 1 μM oligo (dT)<sub>15</sub> primer, 0.5 U/μl RNase inhibitor, and 0.2 U/μl Superscript II RNase H<sup>-</sup> Reverse Transcriptase was added to each tube containing extracted RNA, and incubated at 42 °C for 60 min, followed by 93 °C for 5 min to terminate the reaction. All of the first-strand cDNA was used to synthesize double-stranded cDNA (ds-cDNA) by TaKaRa M-MLV RTase cDNA Synthesis Kit according to the manufacturer's instructions. The 50 μl of ds-cDNA synthesis reactions containing 10 μl of first-strand

cDNA solution, 10  $\mu$ l of 5 $\times$ ds-cDNA synthesis buffer (18.8 mM Tris-HCl, 90.6 mM KCl, 4.6 mM MgCl<sub>2</sub>, 10 mM (NH<sub>4</sub>)<sub>2</sub>SO<sub>4</sub>, pH 8.3), 0.15 mM NAD, 0.002% BSA, 3.8 mM DTT, 0.1 mM dNTPs, 6 U of *E.coli* DNA ligase, 6 U of DNA polymerase I, 1 U of *E.coli* RNase H, RNase-free water up to 50  $\mu$ l, was incubated at 16 °C for 1.5 h followed by 70 °C for 10 min to terminate the reaction.

#### **Digestion and ligation of ds-cDNA**

Digestion and ligation reaction were performed on a O.T.P. Safety thermostat (PolyScience, USA). The 5  $\mu$ l of digestion mixture containing 2.5  $\mu$ l of ds-cDNA solution, 0.5  $\mu$ l of 10 $\times$ K Buffer, 5 U of *Mbo* I endonuclease, 1.5  $\mu$ l of sterilized water, was mixed gently and incubated at 37 °C for 2 h followed by 75 °C for 15 min to terminate the reaction. Then digested ds-cDNA was ligated to source-specific adapters, respectively. The sequences of universal primers, gene-specific primers and “Y” shaped adapters were listed in Table S4†. The 20  $\mu$ l of ligation reaction mixture containing 4  $\mu$ l of the digested mixture, 2  $\mu$ l of sterilized water, and 20 pmol of a source-specific adapter was incubated at 70 °C for 10 min, then 2  $\mu$ l of 10 U/ $\mu$ l T4 DNA ligase and 2  $\mu$ l of 10 $\times$ T4 DNA ligase buffer were added before the incubation at 16 °C for 2 h. The ligase was inactivated at 75 °C for 15 min. Finally, equal volume of the barcode-ligated fragments from different sources were pooled for PCR amplification.

#### **PCR and purification of PCR product**

PCR amplification was performed on the PTC-225 Thermal Cycler PCR system (MJ Research, Inc., USA). Fifty microliters of PCR reaction containing 1.5 mM MgCl<sub>2</sub>, 0.2 mM of each dNTP, 1.2  $\mu$ M of each gene-specific primer and the universal primer, 1  $\mu$ l of equally mixed ligation products as templates, and 1.25 U of *rTaq* DNA polymerase. The PCR program is as follows: denatured at 94 °C for 3 min, followed by 35 thermal cycles (94 °C for 30 s; 55 °C for 30 s; 72 °C for 45 s). After the cycle reaction, the product was incubated at 72 °C for 10 min and held at 16 °C. Amplification was performed on a PTC-225 Thermal Cycler PCR system (MJ Research, Inc., USA). Then the PCR products were purified by BioSpin PCR purification kit to remove surplus biotinylated primers.

As pyrosequencing was used for decoding the barcodes in PCR products, cross-contamination from PCR products may occur. To prevent any possible false positive results, it is necessary to perform PCR using filter-tips at a qualified PCR lab. In addition, a negative control should be carried out in parallel from the beginning of the assay (enzyme digestion step). Agarose gel-electrophoresis can be used to verify the negative control. If a clear pattern is obtained, pyrosequencing is then performed on samples.

#### **Template preparation for pyrosequencing**

The biotinylated PCR products were immobilized onto streptavidin-coated M280

Dynabeads, and DNA strands were separated by melting with 0.1 M NaOH. After washing with 1×annealing buffer (4 mM Tris-HCl, pH 7.5, 2 mM MgCl<sub>2</sub>, 5 mM NaCl), the sequencing primer was added to the single-stranded DNA for annealing at 80 °C for 2 min.

### **Pyrosequencing reaction**

Pyrosequencing was carried out by the reported method.<sup>1-8</sup> The reaction volume was 100 µl, containing 0.1 M tris-acetate (pH 7.7), 2 mM EDTA, 10 mM magnesium acetate, 0.1% BSA, 1 mM dithiothreitol, 2 µM adenosine 5'-phosphosulfate 0.4 mg/ml PVP, 0.4 mM D-luciferin, 200 mU/ml ATP sulfurylase, 3 µg/ml luciferase, 18 U/ml Sequenase 2.0 or 18 U/ml Exo<sup>-</sup> Klenow Fragment, and 1.6 U/ml apyrase.

Pyrosequencing can also be performed by using commercialized PyroMark GOLD reagent kit (Qiagen, Germany) at PyroMark ID instrument (Qiagen, Germany).

### **Real-time PCR**

Real-time PCR amplification was carried out with a DNA Engine Opticon 2 Thermal Cycler system (MJ Research, Inc., USA). Twenty-five µl of reaction mixture contains 12.5 µl of SYBR *Premix Ex Taq*<sup>TM</sup> (2×), 0.4 µM each primer, 1 µl of diluted (1/30) ss-cDNA (synthesized from 1.5 µg of total RNA), 9.5 µl of sterilized water. The program used was initial denaturation at 94 °C for 5 min followed by 40 cycles of 94 °C for 30 s, 55 °C for 30 s, 72 °C for 40 s, plate read at 81 °C for 0.01 s, followed by a final extension of 7 min at 72 °C.

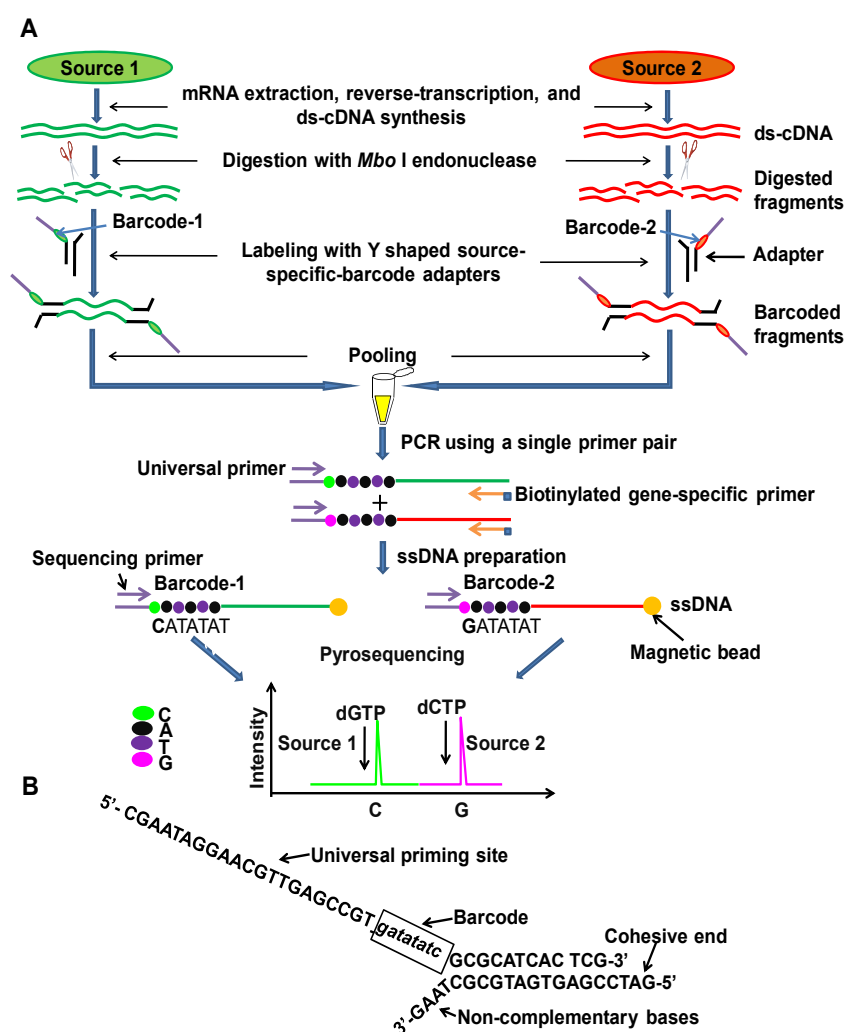

**Fig. S1†** Flowchart used to analyze relative expression levels of a given gene between two different sources (A) and the typical structure of “Y”-shaped source-specific-barcode adapter (B). This figure illustrates the principle of BAMGA and the structure of “Y”-shaped source-specific-barcode adapter.

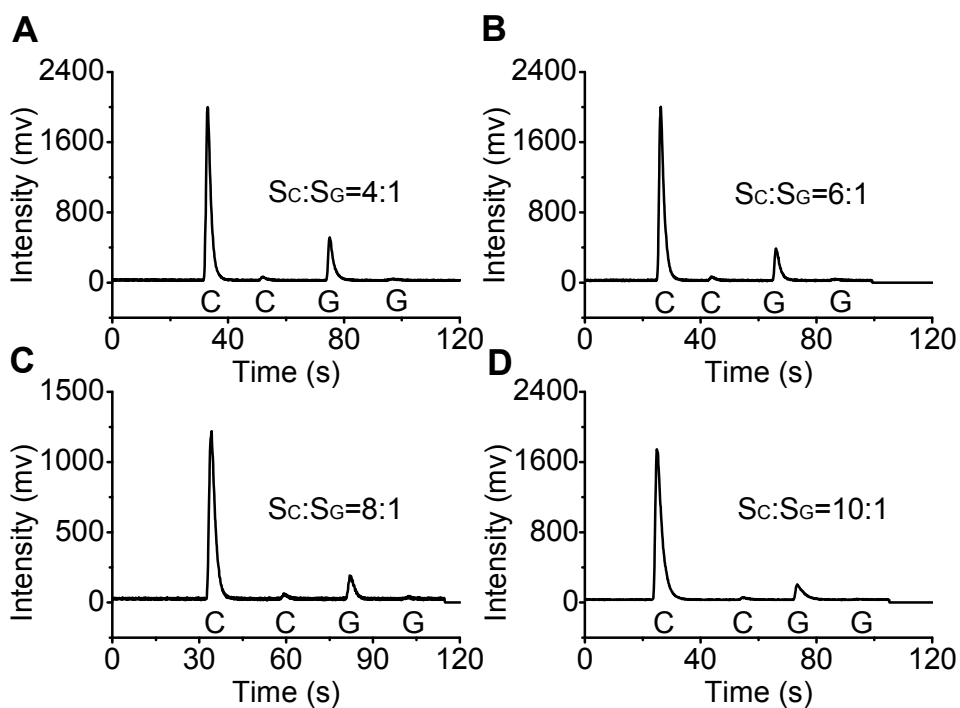

**Fig. S2†** Effect of coexisting DNA fragments on the accuracy of BAMGA. The theoretical ratios of the  $\beta$ -ACTIN gene between 2 artificially-prepared sources, which contains extra 0.42  $\mu$ g of mouse-source double-stranded non-target cDNA, are 4:1 (A), 6:1 (B), 8:1 (C), and 10:1 (D), respectively. The expected ratios were directly marked in the pyrograms. The ratios were calculated with the peak intensities specific to barcodes encoded by adapter ligation reaction. **This figure indicates that non-target RNA coexisting in target RNA barely affect the accuracy of BAMGA.**

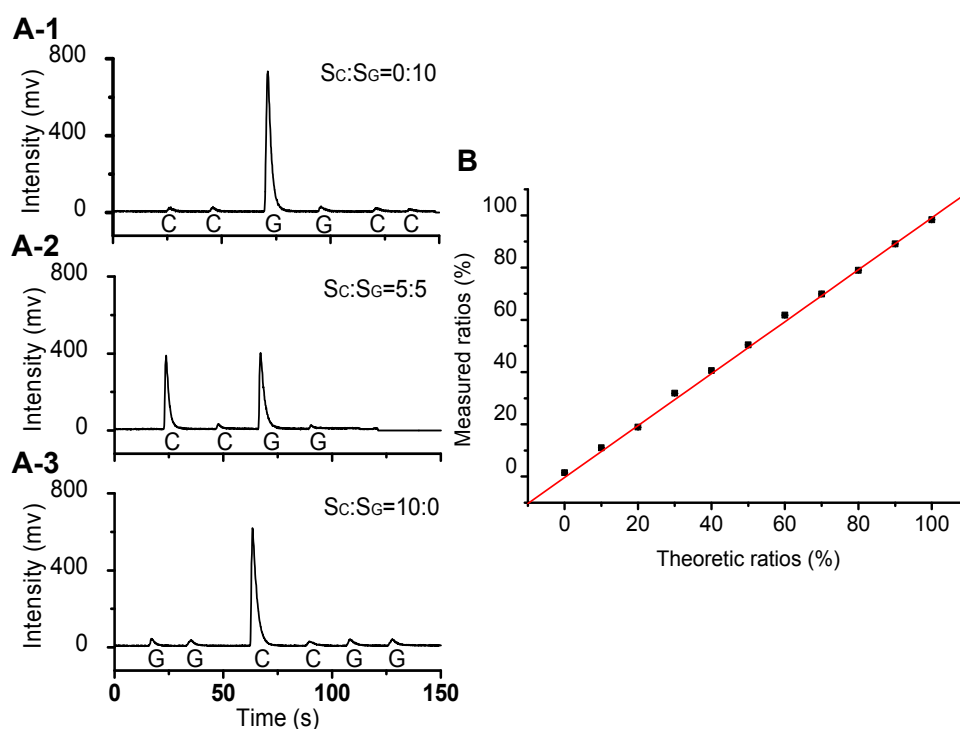

**Fig. S3†** Quantitative evaluation of the multiplex bioassay based on BAMGA. (A) Typical pyrograms of artificially-prepared sources by mixing ds-cDNAs ligated with barcode-1 and barcode-2 at various ratios (0:10, 5:5, and 10:0). Each dNTP was dispensed twice for monitoring the background due to PPi impurity in dNTP solution. (B) Correlation between the expected ratios of the amounts of the *GAPDH* transcripts in two sources and the measured ratios by BAMGA. The ratios were calculated with the formula of “ $G / (G + C) \times 100$ ” where G and C mean the peak intensity. **This figure indicates that BAMGA owns a good quantification performance.**

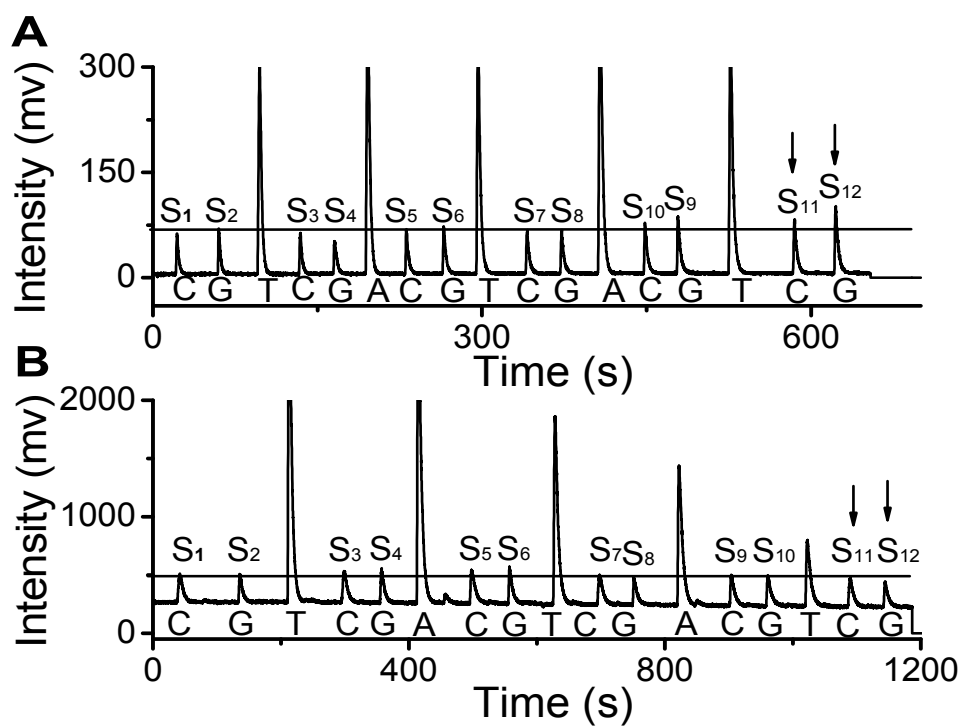

**Fig. S4†** Pyrograms for decoding barcodes by using dNTPs (A) and ddNTPs (B) in pyrosequencing reaction. The transcript concentration of the target gene (the *CDK4* gene) in each of 12 artificially prepared sources (from S1 to S12) is equal. **This figure indicates that pyrosequencing by ddNTP improves the quantification quality of BAMGA.**



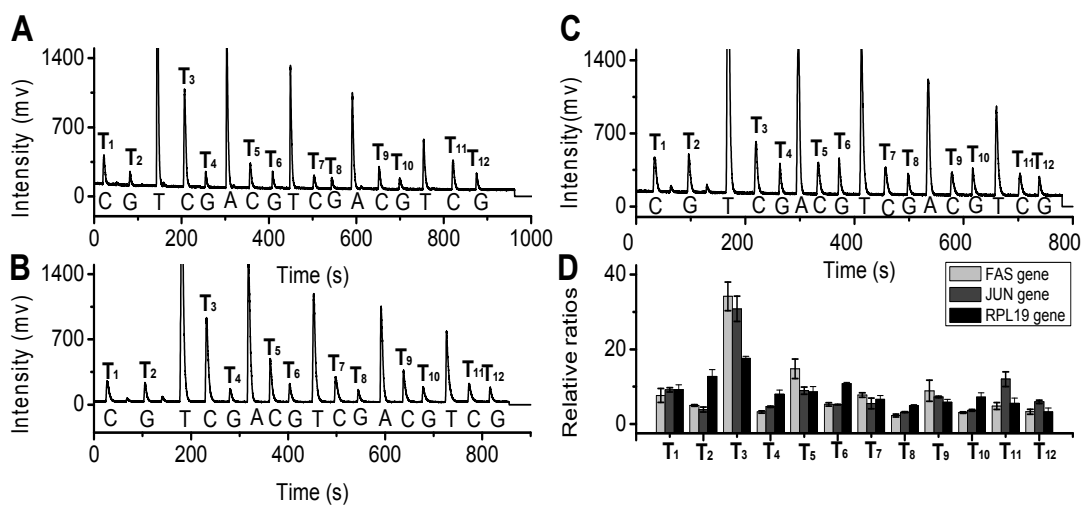

**Fig. S5†.** Results of relative gene expression levels of the *JUN* gene (A), the *RPL19* gene (B), and the *FAS* gene (C) among 12 different organs (small intestines, right brain, large intestine, cerebellum, spleen, lung, left brain, bladder, heart, stomach, ear, and kidney) of a mouse by multiplex bioassay based on BAMGA. “T” means the tissue in which a gene of interest exists. (D) Histograms of relative gene expression levels of the three genes among 12 different organs of a mouse by pyrosequencing. **This figure indicates the data of 12-plex BAMGA for detecting real biological samples.**

**Table S1†.** Results of gene expression levels of the  $\beta$ -*ACTIN* gene among 12 different organs of a mouse by real-time PCR.

| Organs           | CT value | Copies  | Average copies |
|------------------|----------|---------|----------------|
| small intestines | 23.127   | 138444  | 145652         |
|                  | 23.353   | 121952  |                |
|                  | 22.693   | 176561  |                |
| right brain      | 23.191   | 133575  | 91163          |
|                  | 24.187   | 76384.5 |                |
|                  | 24.515   | 63530.6 |                |
| large intestine  | 22.035   | 255466  | 253477         |
|                  | 22.127   | 242664  |                |
|                  | 21.988   | 262302  |                |
| cerebellum       | 24.149   | 78026.6 | 67881          |
|                  | 24.936   | 50154.2 |                |
|                  | 24.208   | 75463.1 |                |
| spleen           | 21.825   | 287418  | 269926         |
|                  | 22.135   | 241504  |                |
|                  | 21.866   | 280856  |                |
| lung             | 23.958   | 86840.8 | 110280         |
|                  | 23.318   | 124333  |                |
|                  | 23.387   | 119666  |                |
| left brain       | 23.980   | 85779.7 | 83260          |
|                  | 24.247   | 73840.8 |                |
|                  | 23.891   | 90159   |                |
| bladder          | 24.335   | 70266.3 | 68633          |
|                  | 24.174   | 76934.2 |                |
|                  | 24.656   | 58698.1 |                |
| heart            | 26.596   | 19766.4 | 14997          |
|                  | 27.633   | 11044.9 |                |
|                  | 27.188   | 14180.2 |                |
| stomach          | 24.188   | 76308.7 | 61711          |
|                  | 24.565   | 61763.4 |                |
|                  | 25.050   | 47060.9 |                |
| ear              | 27.273   | 13519.9 | 14930          |
|                  | 26.981   | 15926.5 |                |
|                  | 27.047   | 15346.9 |                |
| kidney           | 24.364   | 69159.5 | 53973          |
|                  | 25.400   | 38664.5 |                |
|                  | 24.802   | 54096.1 |                |

**Table S2†.** Comparison of the relative expression levels of the  $\beta$ -*ACTIN* gene among 12 organ tissues of a mouse between BAMGA and real-time PCR.

| Methods       | Small intestines (T <sub>1</sub> %) | Right brain (T <sub>2</sub> %) | Large intestine (T <sub>3</sub> %) | Cerebellum (T <sub>4</sub> %) | Spleen (T <sub>5</sub> %) | Lung (T <sub>6</sub> %) | Left brain (T <sub>7</sub> %) | Bladder (T <sub>8</sub> %) | Heart (T <sub>9</sub> %) | Stomach (T <sub>10</sub> %) | Ear (T <sub>11</sub> %) | Kidney (T <sub>12</sub> %) |
|---------------|-------------------------------------|--------------------------------|------------------------------------|-------------------------------|---------------------------|-------------------------|-------------------------------|----------------------------|--------------------------|-----------------------------|-------------------------|----------------------------|
| Real-time PCR | 12.3±1.8                            | 7.6±2.4                        | 21.6±3.2                           | 5.8±1.7                       | 22.8±1.1                  | 9.5±2.6                 | 7.1±1.1                       | 5.8±0.9                    | 1.2±0.2                  | 5.1±0.6                     | 1.3±0.1                 | 4.5±1.1                    |
| BAMGA         | 13.7±1.8                            | 8.4±1.0                        | 19.2±3.5                           | 6.1±0.4                       | 21.0±1.1                  | 7.6±0.3                 | 6.3±0.7                       | 5.1±0.8                    | 2.4±0.3                  | 4.4±0.7                     | 2.9±1.3                 | 3.0±1.2                    |

**Table S3†.** Results of relative expression levels of the  $\beta$ -*ACTIN*, *JUN*, *RPL19*, and *FAS* gene among 12 organ tissues of a mouse by BAMGA.

| Genes                  | Small intestines (T <sub>1</sub> %) | Right brain (T <sub>2</sub> %) | Large intestine (T <sub>3</sub> %) | Cerebellum (T <sub>4</sub> %) | Spleen (T <sub>5</sub> %) | Lung (T <sub>6</sub> %) | Left brain (T <sub>7</sub> %) | Bladder (T <sub>8</sub> %) | Heart (T <sub>9</sub> %) | Stomach (T <sub>10</sub> %) | Ear (T <sub>11</sub> %) | Kidney (T <sub>12</sub> %) |
|------------------------|-------------------------------------|--------------------------------|------------------------------------|-------------------------------|---------------------------|-------------------------|-------------------------------|----------------------------|--------------------------|-----------------------------|-------------------------|----------------------------|
| $\beta$ - <i>ACTIN</i> | 13.7±1.8                            | 8.4±1.0                        | 19.2±3.5                           | 6.1±0.4                       | 21.0±1.1                  | 7.6±0.3                 | 6.3±0.7                       | 5.1±0.8                    | 2.4±0.3                  | 4.4±0.7                     | 2.9±1.3                 | 3.0±1.2                    |
| <i>JUN</i>             | 9.1±0.6                             | 3.9±0.7                        | 30.8±3.4                           | 4.6±0.2                       | 8.9±1.0                   | 5.2±0.1                 | 5.5±1.4                       | 3.1±0.1                    | 7.2±0.2                  | 3.6±0.3                     | 12.0±2.0                | 5.9±0.4                    |
| <i>RPL19</i>           | 9.2±1.3                             | 12.7±1.9                       | 17.5±0.6                           | 7.9±1.2                       | 8.6±1.4                   | 10.8±0.4                | 6.6±1.1                       | 4.9±0.3                    | 5.8±0.8                  | 7.2±1.1                     | 5.5±1.4                 | 3.2±1.0                    |
| <i>FAS</i>             | 7.6±1.9                             | 5.0±0.2                        | 34.2±3.9                           | 3.2±0.3                       | 14.8±2.6                  | 5.2±0.4                 | 7.7±0.6                       | 2.2±0.4                    | 8.9±2.8                  | 3.1±0.2                     | 4.8±0.9                 | 3.3±0.7                    |

**Table S4†.** Primers for relative gene expression analysis by multiplex bioassay based on BAMGA.

| Primers       | Sequences ( 5'→3')                                 |
|---------------|----------------------------------------------------|
| adaptor-1-G   | CGAATAGGAACGTTGAGCCGT <u>GATATATCGCGCATCACTCG</u>  |
| adaptor-1-C   | CGAATAGGAACGTTGAGCCGT <u>CATATATGGCGCATCACTCG</u>  |
| adaptor-2-G   | CGAATAGGAACGTTGAGCCGTT <u>TATAACGCGCATCACTCG</u>   |
| adaptor-2-C   | CGAATAGGAACGTTGAGCCGTT <u>CTATAAGGCGCATCACTCG</u>  |
| adaptor-3-G   | CGAATAGGAACGTTGAGCCGTT <u>AGATATCGCGCATCACTCG</u>  |
| adaptor-3-C   | CGAATAGGAACGTTGAGCCGTT <u>ACATATGGCGCATCACTCG</u>  |
| adaptor-4-G   | CGAATAGGAACGTTGAGCCGTT <u>TATGTAACGCGCATCACTCG</u> |
| adaptor-4-C   | CGAATAGGAACGTTGAGCCGTT <u>TATCTAAGGCGCATCACTCG</u> |
| adaptor-5-G   | CGAATAGGAACGTTGAGCCGTT <u>TATAGATCGCGCATCACTCG</u> |
| adaptor-5-C   | CGAATAGGAACGTTGAGCCGTT <u>TATACATGGCGCATCACTCG</u> |
| adaptor-6-G   | CGAATAGGAACGTTGAGCCGTT <u>TATATGACGCGCATCACTCG</u> |
| adaptor-6-C   | CGAATAGGAACGTTGAGCCGTT <u>TATATCAGGCGCATCACTCG</u> |
| adapter-UP    | GATCCGAGTGATGCGCTAAG                               |
| Up-1          | CGAATAGGAACGTTGAGCCGT                              |
| bio-Up-1      | bio-CGAATAGGAACGTTGAGCCGT                          |
| Up-2          | CGAATAGGAACGTTGAGC                                 |
| bio-Up-2      | bio-CGAATAGGAACGTTGAGC                             |
| Mus-GAPDH-F   | ATGTCGTGGAGTCTACTGGTGT                             |
| Mus-GAPDH-R   | TGGAAGAGTGGGAGTTGCTG                               |
| Mus-CDK4-F    | CGTTGGCTGTATCTTTGCG                                |
| Mus-CDK4-R    | AGGAGAGGTGGGACTTGT                                 |
| Mus-β-ACTIN-F | CTGTCCCTGTATGCCTCTGGT                              |
| Mus-β-ACTIN-R | CTTTGATGTACGACGATTT                                |
| Mus-RPL19-F   | GCCTGTGACTGTCCATTCCC                               |
| Mus-RPL19-R   | CTTGCTGCCTTCAGCTTGTG                               |
| Mus-FAS-F     | GGACCTTGAAAATCAACCC                                |
| Mus-FAS-R     | GCAGAGAATAACAGAAGCAGT                              |
| Mus-JUN-F     | GATTTGAAGCATTCTGAGTTTACC                           |
| Mus-JUN-R     | ACACCACACCATCTTCTGGTG                              |

The underlined bases represent the sequences of barcodes.

## References

1. F. Mashayekhi and M. Ronaghi, *Anal Biochem*, 2007, **363**, 275-287.
2. A. M. Divne, H. Edlund and M. Allen, *Forensic Sci Int Genet*, **4**, 122-129.
3. B. Gharizadeh, J. Eriksson, N. Nourizad, T. Nordstrom and P. Nyren, *Anal Biochem*, 2004, **330**, 272-280.
4. B. Gharizadeh, T. Nordstrom, A. Ahmadian, M. Ronaghi and P. Nyren, *Anal Biochem*, 2002, **301**, 82-90.
5. T. Nordstrom, K. Nourizad, M. Ronaghi and P. Nyren, *Anal Biochem*, 2000, **282**, 186-193.
6. G. Zhou, M. Kamahori, K. Okano, K. Harada and H. Kambara, *Electrophoresis*, 2001, **22**, 3497-3504.
7. B. Gharizadeh, A. Ohlin, P. Molling, A. Backman, B. Amini, P. Olcen and P. Nyren, *Mol Cell Probes*, 2003, **17**, 203-210.
8. J. Eriksson, B. Gharizadeh, T. Nordstrom and P. Nyren, *Electrophoresis*, 2004, **25**, 20-27.
